# Supplementary material for: Predictors of HIV serostatus disclosure to partners among HIV-positive pregnant women in Morogoro, Tanzania
Source: PubMed Central journal article supplement (PMC3668140; doi:10.1186/1471-2458-13-433), 2013-05-03
Supplement: 1471-2458-13-433-S1.pdf [file 1471-2458-13-433-S1.pdf]

**APPENDIX 2: Questionnaires**

Client no-----

Name of the clinic/ hospital-----

Ward.....

Gestation age:.....

Gestation age when start ANC care.....

No of times the woman has attended for ANC care.....

| S.N                                                                 | QUESTION                                                  | OPTIONS                                                                                                                                                          | CODE NO. |
|---------------------------------------------------------------------|-----------------------------------------------------------|------------------------------------------------------------------------------------------------------------------------------------------------------------------|----------|
| <b>PART I- Demographic and household information. (Objective 2)</b> |                                                           |                                                                                                                                                                  |          |
| 1                                                                   | When were you born?                                       | Month/year                                                                                                                                                       | ( )      |
| 2.                                                                  | What is your religion?                                    | 01 Christian<br>02 Muslim<br>03 Non region<br>03 Other specify                                                                                                   | ( )      |
| 3                                                                   | Are you employed and receive regular monthly salary?      | 01 Yes. → 4<br>02 No. → 5                                                                                                                                        | ( )      |
| 4                                                                   | What is your present occupation?                          | -----                                                                                                                                                            |          |
| 5                                                                   | If you are not employed, what do you do to earn income?   | 01 Farmer<br>02 Peasant<br>03 Business<br>04 Other specify                                                                                                       |          |
| 6                                                                   | What is the highest level of education you have attained? | 01 No formal education<br>02 Primary education (class.....)<br>03 O level education (Form.....)<br>04 A level education<br>05 Higher education Diploma or degree | ( )      |
| 7                                                                   | What is your approximate income per month?                | 01 None depend on husband/ relatives /parents<br>02 ≤ 30,000 Tsh per month                                                                                       | ( )      |

|    |                                                                                                                                    |                                                                                                                                                          |                  |
|----|------------------------------------------------------------------------------------------------------------------------------------|----------------------------------------------------------------------------------------------------------------------------------------------------------|------------------|
|    |                                                                                                                                    | (≤ 30 USD per month)<br>03 > 30,000 -100,000 Tsh per month<br>04 > 100,000 – 200,000 Tsh per month+<br>05 > 200,000 Tsh per month                        |                  |
| 8  | What is your current marital status?                                                                                               | 01 Married → 10<br>02 Cohabiting → 10<br>03 Single<br>04 Separated (for how long.....)<br>05 Divorce (for how long.....)<br>06 Widow (for how long.....) | ( )<br><br>----- |
| 9  | What was your marital status when you learned you were HIV infected?                                                               | 01 Married<br>02 Cohabiting<br>03 Single<br>04 Separated<br>05 Divorced<br>06 Widow                                                                      | ( )              |
| 10 | For those married/ cohabiting how long have you lived together?-----                                                               |                                                                                                                                                          |                  |
| 11 | Are you in polygamous relationship?                                                                                                | 01 Yes<br>02 No                                                                                                                                          | ( )              |
| 12 | For the singles, separated, divorced how long have you known or lived with the man who is a father of your current pregnancy?----- |                                                                                                                                                          |                  |
| 13 | How do you live/ living style?                                                                                                     | 01. Living together all the time<br>02. Visits<br>03. Living apart > 6 months                                                                            | ( )              |
| 14 | What is your partners' age?-----                                                                                                   |                                                                                                                                                          |                  |

|                              |                                                                                                          |                                                                                              |            |
|------------------------------|----------------------------------------------------------------------------------------------------------|----------------------------------------------------------------------------------------------|------------|
| 15                           | What is his level of education?-----                                                                     |                                                                                              |            |
| 16                           | What is your partners' occupation?-----                                                                  |                                                                                              |            |
| <b>Household information</b> |                                                                                                          |                                                                                              |            |
| 17                           | What is the total number of people in your household?<br>How many are children, i.e. below 18 years..... |                                                                                              |            |
| 18                           | The house you and your family lives, is it your own house or you are renting?                            | 01. Our own house<br>02. Renting a whole house<br>03. Rent a room<br>04.Others.....<br>..... | ( )        |
| 19                           | Who usually pay for the following things at your house?                                                  |                                                                                              |            |
|                              | costs                                                                                                    | Myself                                                                                       | My partner |
|                              | Purchase food                                                                                            | .....                                                                                        | .....      |
|                              | Pay for the house rent                                                                                   | .....                                                                                        | .....      |
|                              | Pay for the school fees                                                                                  | .....                                                                                        | .....      |
|                              | <b>Reproductive health</b>                                                                               |                                                                                              |            |
| 20                           | Gravida number.....<br><i>For gravida 2 or more (fill Q 21-25)</i>                                       |                                                                                              |            |
| 21                           | How many children did she give birth.....                                                                |                                                                                              |            |
| 22                           | How many living children does the woman has/have?.....                                                   |                                                                                              |            |

|                                     |                                                                                                                                   |                                                                                                                          |                      |
|-------------------------------------|-----------------------------------------------------------------------------------------------------------------------------------|--------------------------------------------------------------------------------------------------------------------------|----------------------|
| 23                                  | <b>History of:</b><br>Miscarriage/abortions<br>Child born alive and died < & year                                                 | Yes<br>.....<br>.....                                                                                                    | No<br>.....<br>..... |
| 24                                  | 24. Age of the last born .....                                                                                                    |                                                                                                                          |                      |
| 25                                  | Do all your children have the same father                                                                                         | 01. Yes ( )<br>02. No                                                                                                    |                      |
| 25                                  | 25. Do all your children have the same father?                                                                                    | 01 Yes<br>02 No                                                                                                          | ( )                  |
| 26                                  | 26. Have you ever used any family planning method before this pregnancy?                                                          | 01 Yes<br>02 No                                                                                                          | ( )                  |
| 27                                  | Have you ever used condoms .                                                                                                      | 01 Yes<br>02 No                                                                                                          | ( )                  |
| 28                                  | Currently, are you using condoms when you have sex with your partner?                                                             | 01 Yes<br>02 No                                                                                                          | ( )                  |
| <b>PART III. Knowledge of PMTCT</b> |                                                                                                                                   |                                                                                                                          |                      |
| 29                                  | Can HIV infected woman transmit the infection to her baby?                                                                        | 01. Yes<br>02. No<br>03. Don't know                                                                                      | ( )                  |
| 30                                  | If YES to question 29, when or at which time can the transmission occur? <b>(Tick all the possible answers the woman mention)</b> | 01 During pregnancy-----<br>02 During labour and delivery-----<br>03 During breastfeeding period-----<br>04 Others:..... |                      |

|                                     |                                                                                                                                      |                                                                                                                                                                                  |     |
|-------------------------------------|--------------------------------------------------------------------------------------------------------------------------------------|----------------------------------------------------------------------------------------------------------------------------------------------------------------------------------|-----|
| 31                                  | Is it possible for HIV positive pregnant mother to prevent her baby from been infected?                                              | 01 Yes<br>02 No<br>03. Don't know                                                                                                                                                | ( ) |
| 32                                  | How can a pregnant HIV positive mother prevents her baby from getting HIV+ infected? (multiple answers are possible)                 | 01. By taking antiretroviral prophylaxis during pregnancy<br>02. Caesarian section<br>03. Exclusive breastfeeding<br>04. Exclusive replacement feeding (AFASS)<br>05.Others..... | ( ) |
| <b>PART IV. Disclosure patterns</b> |                                                                                                                                      |                                                                                                                                                                                  |     |
| 33                                  | When were you first diagnosed HIV positive?                                                                                          | Month/year-----<br>-                                                                                                                                                             |     |
| 34                                  | Did the woman discover she is HIV positive during current pregnancy or before?                                                       | 01. Knew during the current pregnancy<br>02. Knew before this pregnancy                                                                                                          | ( ) |
| 35                                  | Did you discuss with your partner about HIV testing, before you took the test?                                                       | 01. Yes<br>02. No                                                                                                                                                                | ( ) |
| 36                                  | Have you ever disclosed your serostatus?                                                                                             | 01. Yes<br>02. No - - - 42                                                                                                                                                       | ( ) |
| 37                                  | Have you disclosed your serostatus to your partner?<br><i>Have you told your husband/spouse or partner that you are HIV positive</i> | 01 Yes → 38 – 41<br>02 No → 42, 43                                                                                                                                               | ( ) |
| 38                                  | How long after getting your results did you tell your partner you are HIV positive?                                                  | 01. Same day<br>02. Others (specify-----)                                                                                                                                        |     |

|    |                                                                                                           |                                                                                                                            |     |
|----|-----------------------------------------------------------------------------------------------------------|----------------------------------------------------------------------------------------------------------------------------|-----|
| 39 | What was his reaction when you disclosed?                                                                 | 01. He did nothing<br>02. Positive reaction (specify-----<br>03. Negative reaction (specify-----                           |     |
| 40 | Relationship with your partner before testing and disclosure to him.                                      | 01. Smooth relation<br>02. With disagreement                                                                               | ( ) |
| 41 | Relationship with your partner AFTER disclosing your results                                              | 01 Smooth relation<br>02With disagreement                                                                                  | ( ) |
| 42 | <b>If no;</b><br>Are you planning to disclose to him before delivery?                                     | 01. Yes<br>02. No                                                                                                          | ( ) |
| 43 | What do you think will be the reaction of your partner IF you tell him you are HIV positive?              | 01 He will do nothing<br>02 Anticipating a positive reaction (specify.....<br>03 Anticipating a negative reaction (specify | ( ) |
| 44 | Who else did you disclosed your serostaus to?                                                             | 01. Nobody<br>02. Parents.<br>03 Friends<br>04 Sister<br>05 Brother<br>06 Other specify                                    | ( ) |
| 45 | Has your partner come for HIV counseling and testing, here at the clinic/hospital?                        | 01. Yes<br>02. No                                                                                                          | ( ) |
| 46 | Do you know his HIV status                                                                                | 01. Yes<br>02. No                                                                                                          | ( ) |
| 47 | Ever received couple counseling with your current partner?                                                | 01. Yes<br>02. No                                                                                                          | ( ) |
| 48 | Do you think the counselor played a role in influencing your decision on self disclosure to your partner? | 01. Yes<br>02. No                                                                                                          | ( ) |

| <b>PART V. Knowledge on advantages of self disclosure to partners, perceived benefits &amp; barriers.</b> |                                                                                                                                                                                    |                                            |
|-----------------------------------------------------------------------------------------------------------|------------------------------------------------------------------------------------------------------------------------------------------------------------------------------------|--------------------------------------------|
| 49                                                                                                        | Do you think there are any benefits of disclosing your HIV sero status to your partner?                                                                                            | 01 Yes → 50<br>02 No → 51<br><br>( )       |
| 50                                                                                                        | If Yes what are the benefits of disclosing your HIV serostatus to partner?                                                                                                         | 01 -----<br>02 -----<br>03-----<br>04----- |
| 51                                                                                                        | . If no, why not?                                                                                                                                                                  | 01 -----<br>02-----<br>03-----<br>04 ----- |
| 52                                                                                                        | <b>Do you think</b> self disclosure among HIV positive pregnant women to partners increases ARV prophylaxis uptake among women                                                     | 01 Yes<br>02 No<br><br>( )                 |
| 53                                                                                                        | <b>Do you think</b> self disclosure to partners helps in ARV adherence to pregnant women                                                                                           | 01 Yes<br>02 No<br><br>( )                 |
| 54                                                                                                        | <b>Do you think</b> self disclosure of HIV status to partner helps HIV positive pregnant women to bring/ give ARV prophylaxis to their infants after delivery?                     | 01 Yes<br>02 No<br><br>( )                 |
| 55                                                                                                        | <b>Do you think</b> self disclosure among HIV positive pregnant women to their partners helps them to <i>choose</i> the infant feeding method they want?                           | 01 Yes<br>02 No<br><br>( )                 |
| 56                                                                                                        | <b>Do you think</b> self disclosure among HIV positive pregnant women to their partners helps them to <i>adhere</i> to the infant feeding method they will chose/ they have chosen | 01 Yes<br>02 No<br><br>( )                 |

|                                                                                            |                                                                                                                                          |                                           |                  |
|--------------------------------------------------------------------------------------------|------------------------------------------------------------------------------------------------------------------------------------------|-------------------------------------------|------------------|
| 57                                                                                         | <b>Do you think</b> Self disclosure to partners among HIV positive pregnant women helps in future plans for further pregnancies          | 01 Yes<br>02 No                           | ( )              |
| 58                                                                                         | <b>Do you think</b> self disclosure to partners among HIV positive pregnant women helps in discussions and future use of family planning | 01 Yes<br>02 No                           | ( )              |
| 59                                                                                         | <b>Do you think</b> self disclosure to partners among HIV positive pregnant women helps in discussion and future use of condoms          | 01 Yes<br>02 No                           | ( )              |
| 60                                                                                         | Does self HIV disclosure to partners prevent your partner from getting the infection if he is negative                                   | 01 Yes<br>02 No                           | How?-----<br>( ) |
| 61                                                                                         | Does self HIV disclosure to partners prevents a baby from getting the HIV infection?                                                     | 01 Yes<br>02 No                           | How?-----        |
| 62                                                                                         | 64. Does self HIV disclosure to your partner benefit you yourself?                                                                       | 01 Yes<br>02 No                           | How-----<br>( )  |
| 63                                                                                         | What can be the effects if HIV positive pregnant mother did not disclosed her serostatus to her partner?                                 | 01 -----<br>02-----<br>03-----<br>04----- |                  |
| 64                                                                                         | In your area, what are the barriers most HIV pregnant women have in disclosing their status to their husbands/partners?                  | 01 -----<br>02-----<br>03-----<br>04----- |                  |
| 65                                                                                         | In your area, what are the barriers most HIV pregnant women have in disclosing their status to their family members apart from partners? | 01 -----<br>02-----<br>03-----<br>04----- |                  |
| <b>PART V Attitudes of HIV positive pregnant women towards self disclosure to partners</b> |                                                                                                                                          |                                           |                  |



|    |                                                                                                              |                                                                       |     |
|----|--------------------------------------------------------------------------------------------------------------|-----------------------------------------------------------------------|-----|
| 66 | It is good for pregnant women to share their serological results to their partners as early as possible      | 01 Strongly agree.<br>02 Agree<br>03 Strongly disagree<br>04 Disagree | ( ) |
| 67 | Discussion among partners before test it helps pregnant women to disclose their serostatus to their partners | 01 Strongly agree.<br>02 Agree<br>03 Strongly disagree<br>04 Disagree | ( ) |
| 68 | Married pregnant women they found easily to disclose their serostatus.                                       | 01 Strongly agree.<br>02 Agree<br>03 Strongly disagree<br>04 Disagree | ( ) |

69. During the post test counseling session, did the counselor discuss with you about the following issues/ topics? *Tick where appropriate*

|                                                                                | Yes  | No   |
|--------------------------------------------------------------------------------|------|------|
| a) You, taking ARV to reduce HIV transmission to the child                     | .... | .... |
| b) Bringing the child after delivery to get ARV to reduce MTCT of HIV          | .... | .... |
| c) Infant feeding methods                                                      | .... | .... |
| d) Discussed until you choose infant feeding method you will use               | .... | .... |
| e) Discussed about importance of using family planning after delivery          | .... | .... |
| f) Importance of using condoms during sex with your partner                    | .... | .... |
| g) Importance of involving or bring your partner for testing                   | .... | .... |
| h) Importance of disclosing your serostatus to your partner?                   | .... | .... |
| i) Discussed and made a personal plan on how you should disclose to partner--- | ---- | ---- |
